# Supplementary material for: Phase II DeCOG-Study of Ipilimumab in Pretreated and Treatment-Naïve Patients with Metastatic Uveal Melanoma
Source: PubMed Central journal article supplement (PMC4356548; doi:10.1371/journal.pone.0118564), 2015-03-11
Supplement: pone.0118564.s003.pdf [file pone.0118564.s003.pdf]

**Table S1:** Summary of previous studies reporting efficacy of ipilimumab and other therapies in metastatic uveal melanoma within the last 5 years.

| Author    | Year | Drug                     | Study design   | Patients with uveal melanoma (n) | Treatment (pretreated vs. treatment-naïve) | Median PFS (months) | Median OS (months) | 6-month PFS (%)            | 1-year OS (%)   | 2-year OS (%) |
|-----------|------|--------------------------|----------------|----------------------------------|--------------------------------------------|---------------------|--------------------|----------------------------|-----------------|---------------|
| Kelderman | 2013 | Ipilimumab 3mg           | EAP            | 22                               | pretreated                                 | 2.9                 | 5.2                | n.a.                       | 27              | n.a.          |
| Khattak   | 2013 | Ipilimumab 3mg           | EAP            | 5                                | pretreated                                 | n.a.                | 10.3               | n.a.                       | n.a.            | n.a.          |
| Danielli  | 2012 | Ipilimumab 10mg          | EAP            | 13                               | pretreated                                 | n.a.                | 9.0                | n.a.                       | n.a.            | n.a.          |
| Maio      | 2013 | Ipilimumab 3mg           | EAP            | 83                               | pretreated                                 | 3.6                 | 6.0                | n.a.,<br>1-year<br>PFS: 11 | Estimated<br>31 | n.a.          |
| Luke      | 2013 | Ipilimumab 3mg and 10 mg | Retro-spective | 39 (34: 3 mg; 5: 10 mg)          | treatment-naïve (n=4) and pretreated       | n.a.                | 9.6                | n.a.                       | n.a.            | n.a.          |
| Deo       | 2014 | Ipilimumab 3mg           | Retro-spective | 24                               | pretreated                                 | 2.8                 | 9.7                | n.a.                       | 46              | 11            |
| Piulats   | 2014 | Ipilimumab 10mg          | Phase 2        | 32                               | treatment-naïve                            | n.a.                | 9.8                | 27                         | n.a.            | n.a.          |
| Zimmer    | 2014 | Ipilimumab 3mg           | Phase 2        | 53                               | treatment-naïve (n=8), pretreated (n=45)   | 2.8                 | 6.8                | 19                         | 22              | 7             |

| Author   | Year | Drug                                                                                            | Study design                   | Patients with uveal melanoma (n)                | Treatment (pretreated vs. treatment-naïve) | Median PFS (months)                              | Median OS (months)                     | 6-month PFS (%) | 1-year OS (%)          | 2-year OS (%) |
|----------|------|-------------------------------------------------------------------------------------------------|--------------------------------|-------------------------------------------------|--------------------------------------------|--------------------------------------------------|----------------------------------------|-----------------|------------------------|---------------|
| Carvajal | 2014 | 1.dacarbazine 1000 mg/qm or temozolamide 150mg/qm<br>2. selumetinib 75 mg twice daily           | Randomized open-label, phase 2 | Total:101<br>Chemo-therapy:51<br>Selumetinib:50 | treatment-naïve and pretreated             | Chemotherapy: 7 weeks<br>Selumetinib: 15.9 weeks | Chemotherapy: 9.1<br>Selumetinib: 11.8 | 5.7<br>22.9     | Around 32<br>Around 42 | n.a.          |
| Bhatia   | 2012 | Carboplatin (AUC=6)+paclitaxel (225 mg/qm) plus sorafenib (400 mg per os twice daily)           | Phase 2                        | 25                                              | treatment-naïve (n=20), pretreated (n=4)   | 4.0                                              | 11.0                                   | 29              | Estimated 42           | n.a.          |
| Leyvraz  | 2014 | 1.hepatic intra-arterial (HIA) fotemustine 100 mg/qm<br>2.intravenous (IV) fotemustine 100mg/qm | Randomized phase 3             | 171                                             | treatment-naïve                            | HIA: 4.5<br>IV: 3.5                              | HIA: 14.6<br>IV: 13.8                  | n.a.            | n.a.                   | n.a.          |
| Spagnolo | 2013 | Fotemustine 100mg/qm intravenous                                                                | Retro-spective                 | 25                                              | treatment-naive                            | n.a.                                             | 13.9                                   | n.a.            | 60                     | n.a.          |
| Homsi    | 2010 | DHA-paclitaxel 500mg/qm                                                                         | Phase 2                        | 22                                              | treatment-naïve (n=11), pretreated (n=11)  | n.a.                                             | 9.8                                    | n.a.            | 50                     | <10           |

Abbreviations: EAP, expanded access program; AUC, area under the curve; DHA, docosahexaenoic-acid; PFS, progression-free survival; OS, overall survival; n.a., not applicable
